# Supplementary material for: ORCHILEAK (revision 3875): a new model branch to simulate carbon transfers along the terrestrial–aquatic continuum of the Amazon basin
Source: Copernicus journal article supplement (doi:10.5194/gmd-10-3821-2017), 2017-10-23
Supplement: Supplementary file 1 [file gmd-10-3821-2017-supplement.zip]

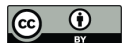

*Supplement of*

## **ORCHILEAK (revision 3875): a new model branch to simulate carbon transfers along the terrestrial–aquatic continuum of the Amazon basin**

**Ronny Lauerwald et al.**

*Correspondence to:* Ronny Lauerwald ([r.lauerwald@exeter.ac.uk](mailto:r.lauerwald@exeter.ac.uk))

- [gmd-10-3821-2017-supplement-title-page.pdf](#)
- [SI\\_20170814](#)
  - [How\\_to\\_install.txt](#)
  - [ORCHIDEE.zip](#)

The copyright of individual parts of the supplement might differ from the CC BY 3.0 License.
